# Supplementary material for: Structure-based validation can drastically under-estimate error rate in proteome-wide cross-linking mass spectrometry studies
Source: bioRxiv or medRxiv preprint supplement (doi:10.1101/617654), 2019-12-25
Supplement: Supplementary file [file media-1.pdf]

## Supplementary Figures

**Supplementary Figure 1.** Corrected FMI for the three datasets analyzed in the study (Utilizing equation 3 in Methods section). (a) Human proteome XL-MS, (b) *E. coli* proteome XL-MS and (c) Mouse mitochondrial XL-MS.

**Supplementary Figure 2.** Estimated precision using PCA experiments for the three datasets of different quality from the human K562 proteome-wide XL-MS experiment. See Supplementary Note 1 for a detailed description of the methodology.

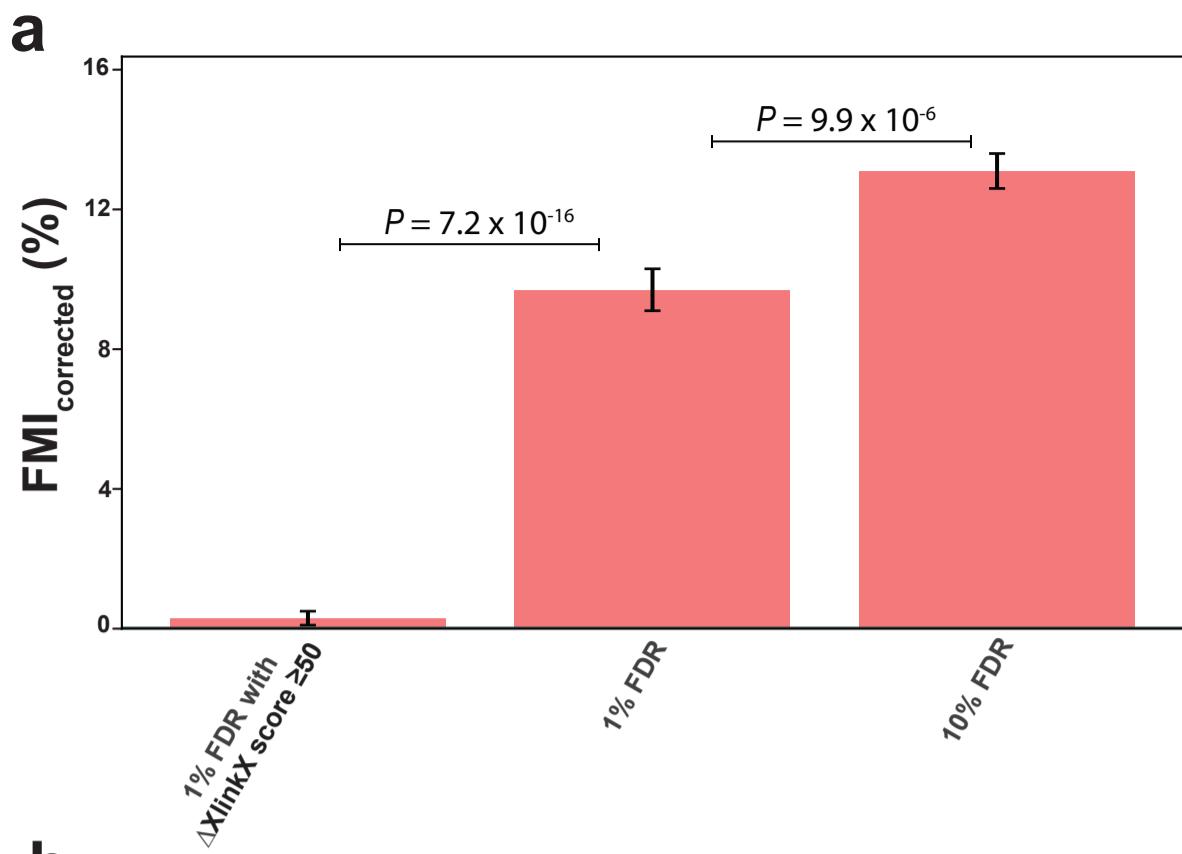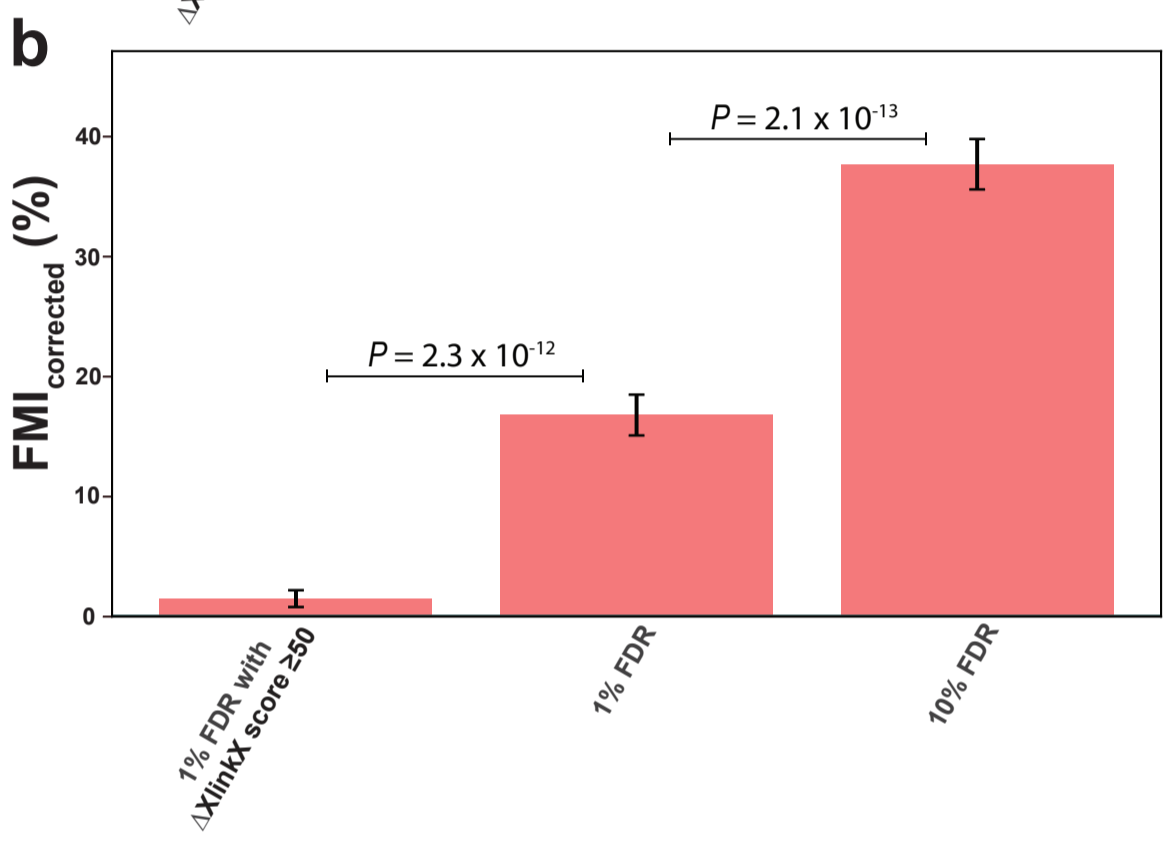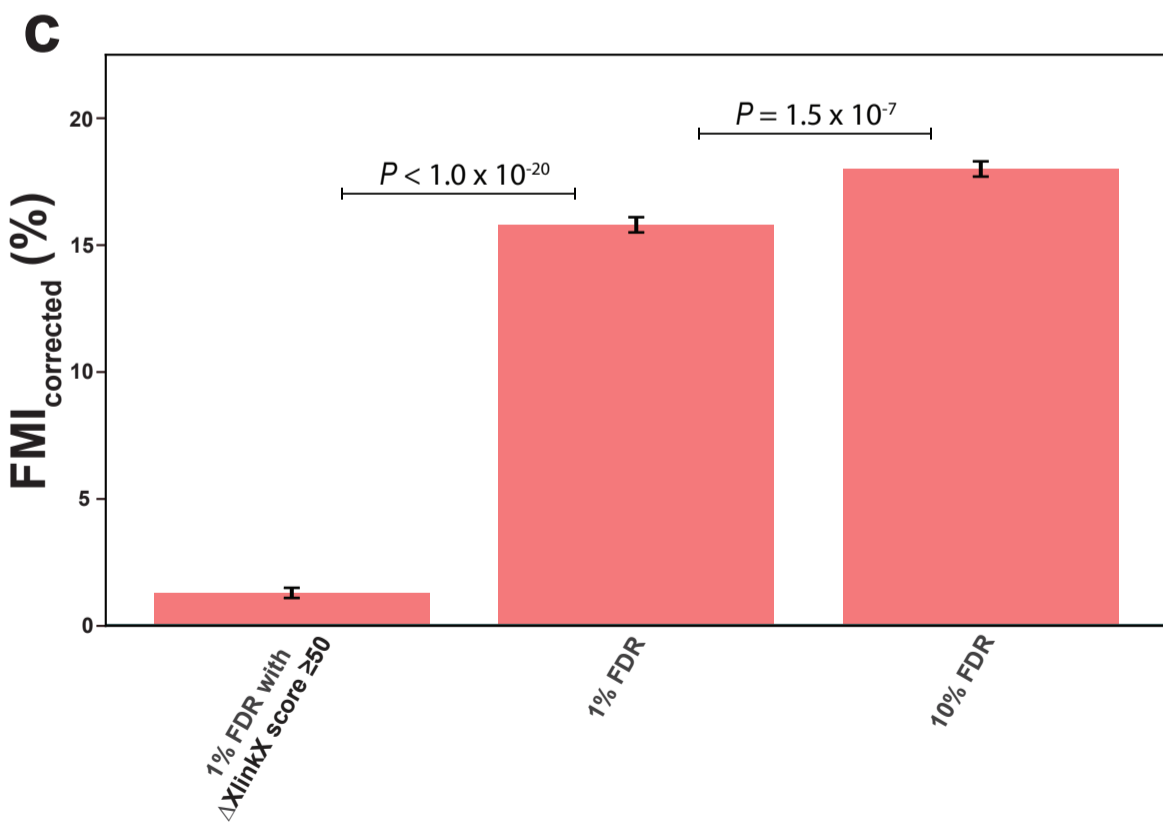

Supplementary Figure 1

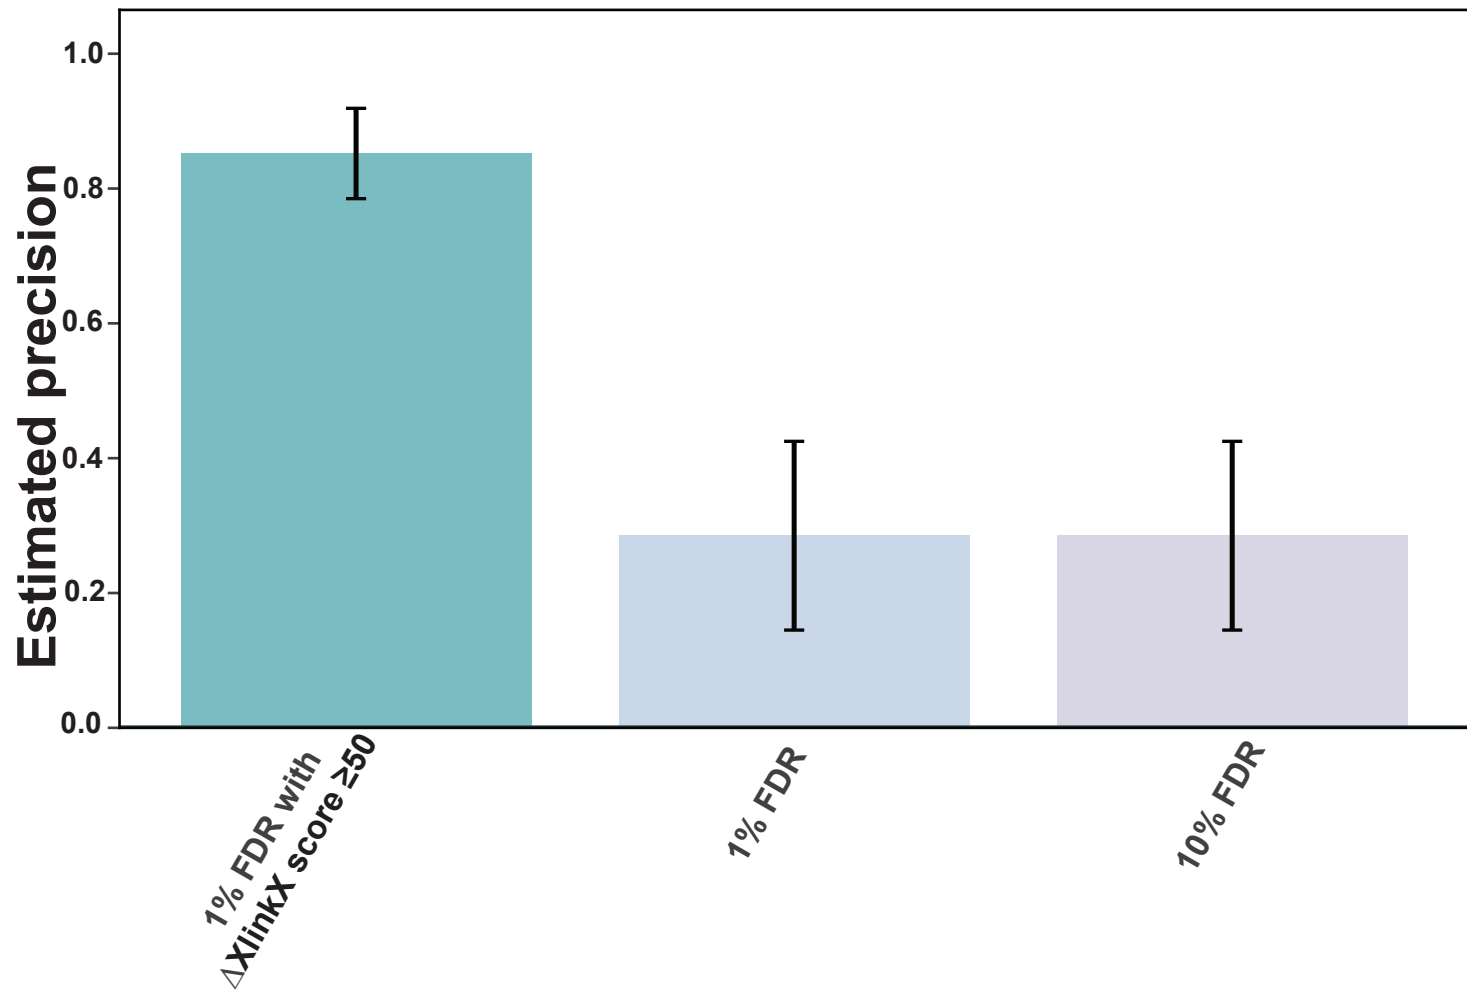

**Supplementary Figure 2**
